# Supplementary material
Source: MDPI journal article supplement (https://www.mdpi.com/2624-5175/5/4/43)

**Fig. 1A**

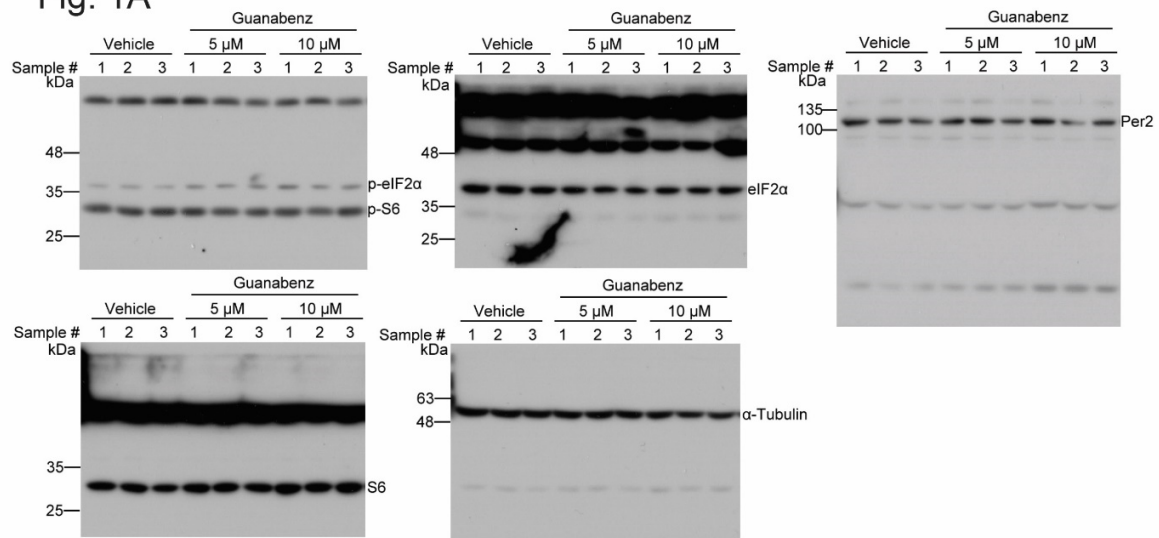

**Fig. 3A**

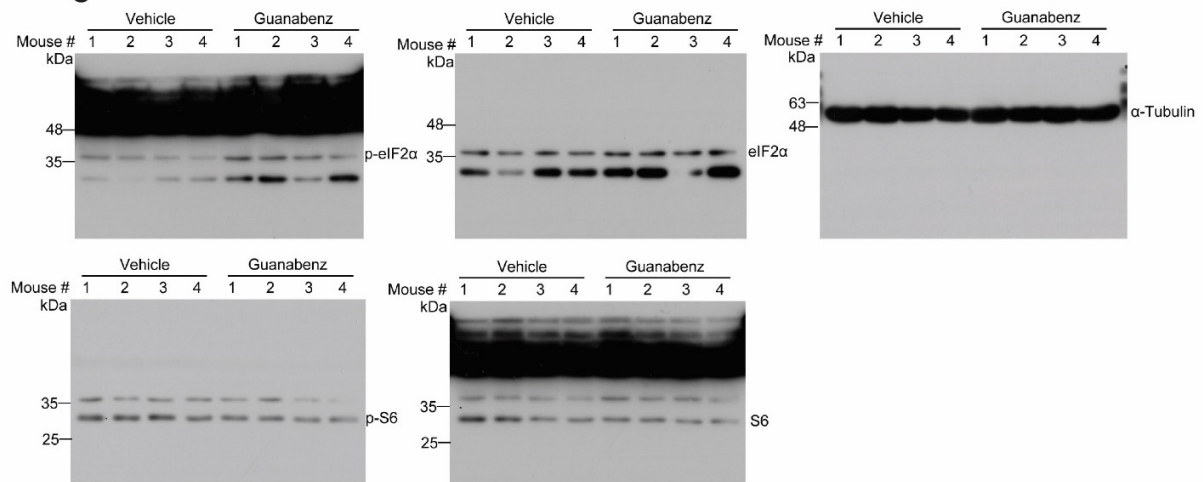

**Supplementary Figure S1. Full-length western blotting images.**

Supplement: s1 [file s1]
